# Supplementary material
Source: PubMed Central journal article supplement (PMC4807284)
Supplement: 10.1074_M115.693655_jbc.M115.693655-1.pdf [file 10.1074_M115.693655_jbc.M115.693655-1.pdf]

Supplemental data : Composition of High Fat Diet (CLEA)

|                        |             |       |
|------------------------|-------------|-------|
| Moister                | (%)         | 6.9   |
| Protein                | (%)         | 25    |
| Fat                    | (%)         | 32.4  |
| Fiber                  | (%)         | 2.9   |
| Ash                    | (%)         | 4     |
| Nitrogen free extract  | (%)         | 28.8  |
| Energy                 | (kcal/100g) | 506.8 |
| Fat-derived energy     | (%)         | 57.5  |
| Protein-derived energy | (%)         | 19.7  |

**Aryl hydrocarbon receptor plays protective roles against HFD-induced hepatic steatosis and the subsequent lipotoxicity via direct transcriptional regulation of *Socs3* expression.**

Taira Wada, Hiroshi Sunaga, Kazuki Miyata, Haruno Shirasaki, Yuki Uchiyama, and Shigeki Shimba
